# Supplementary material
Source: PubMed Central journal article supplement (PMC5423160)

A

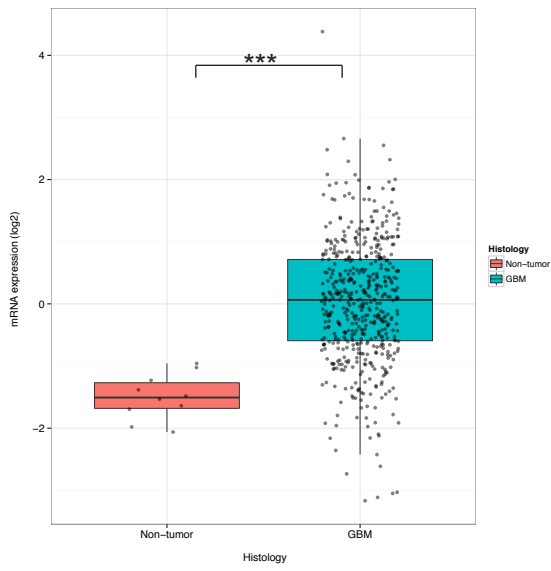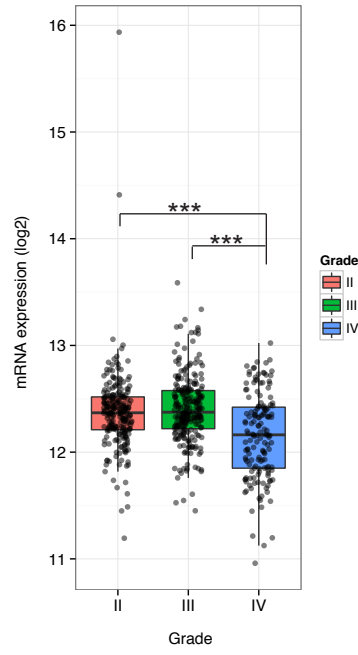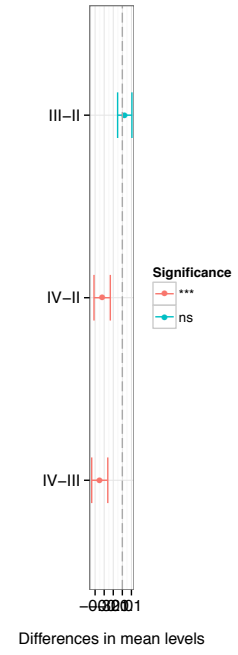

B

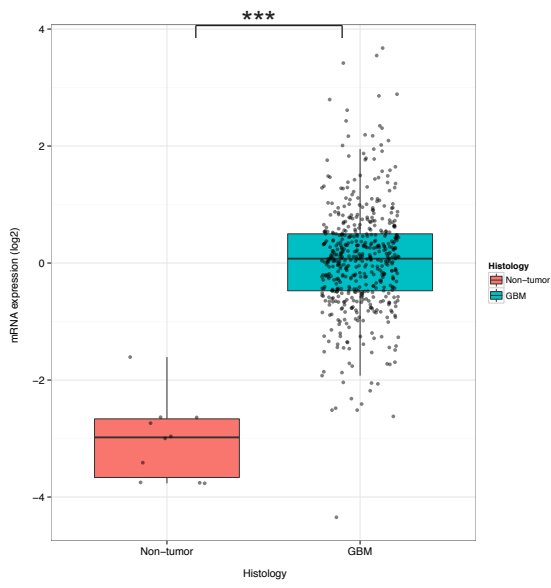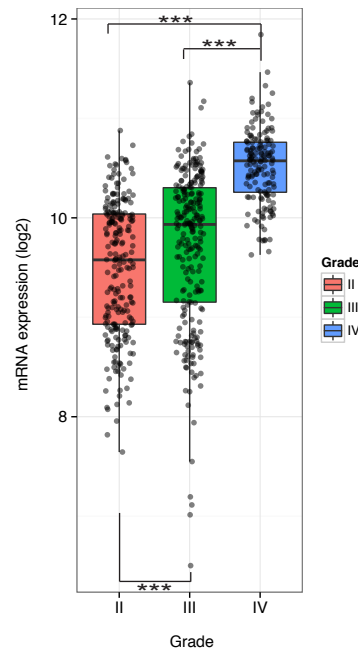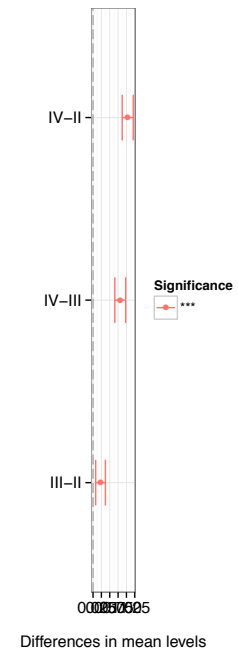

Supplement: MOL2-10-751-s001.pdf [file MOL2-10-751-s001.pdf]

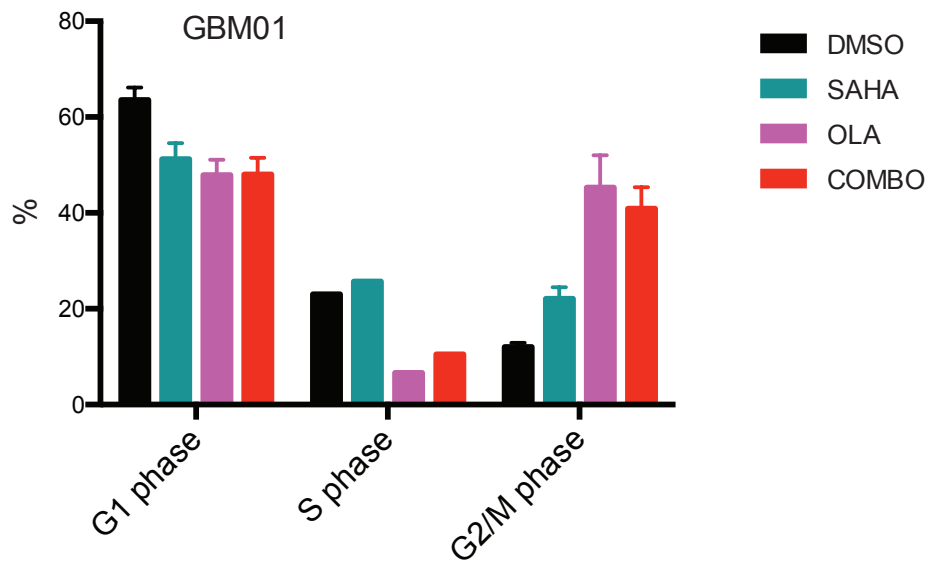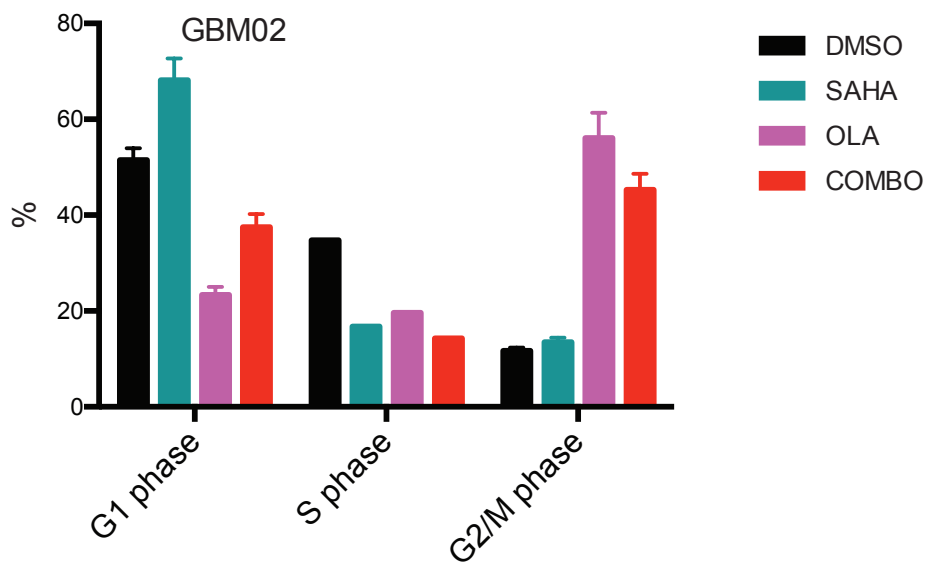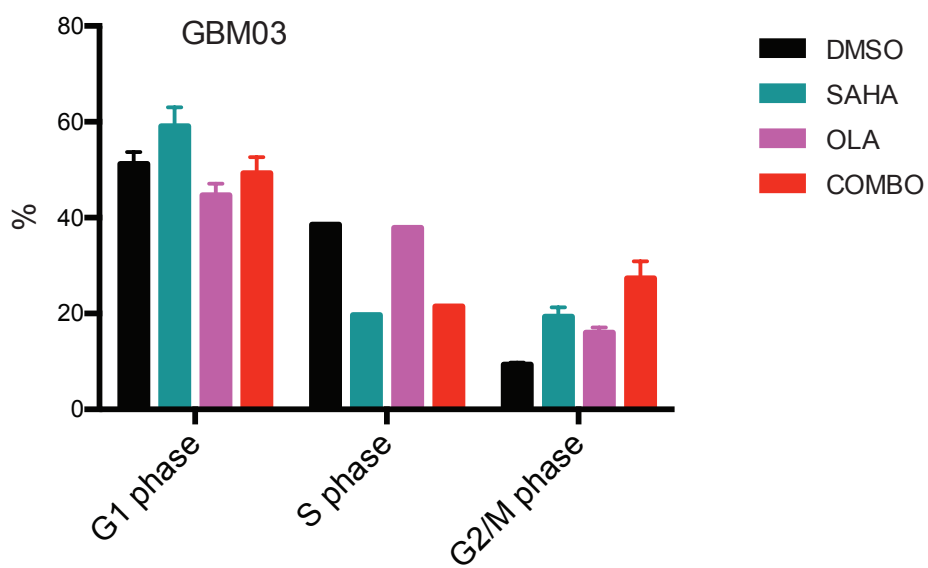

Supplement: MOL2-10-751-s002.pdf [file MOL2-10-751-s002.pdf]

A

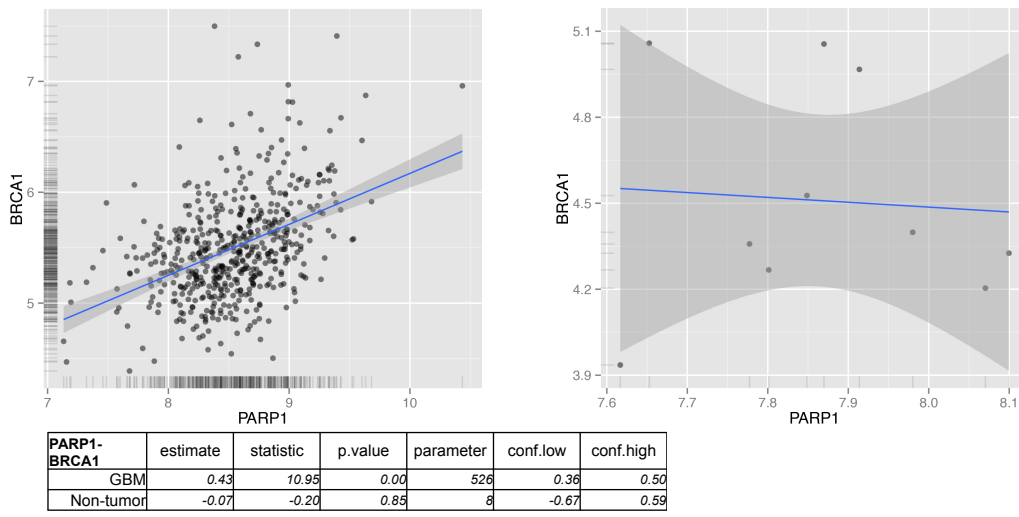

B

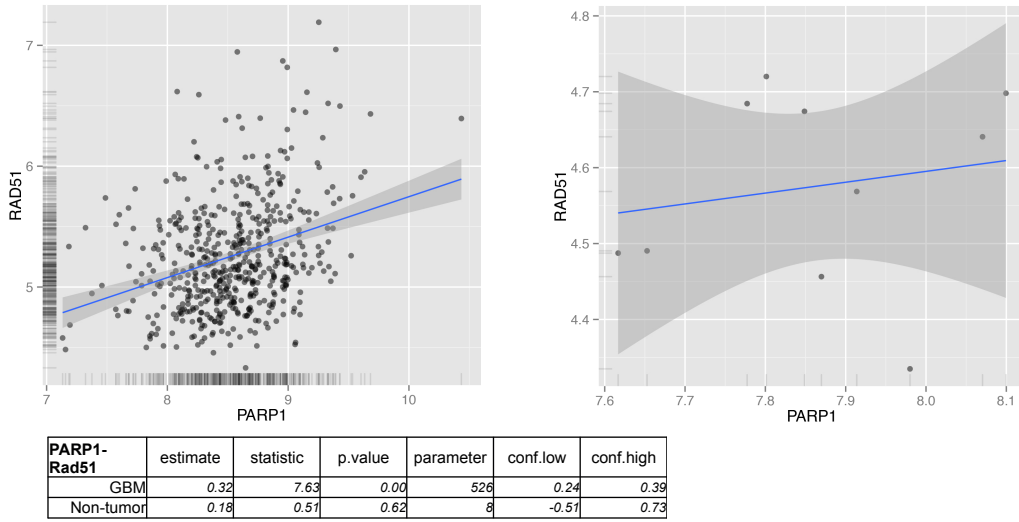

C

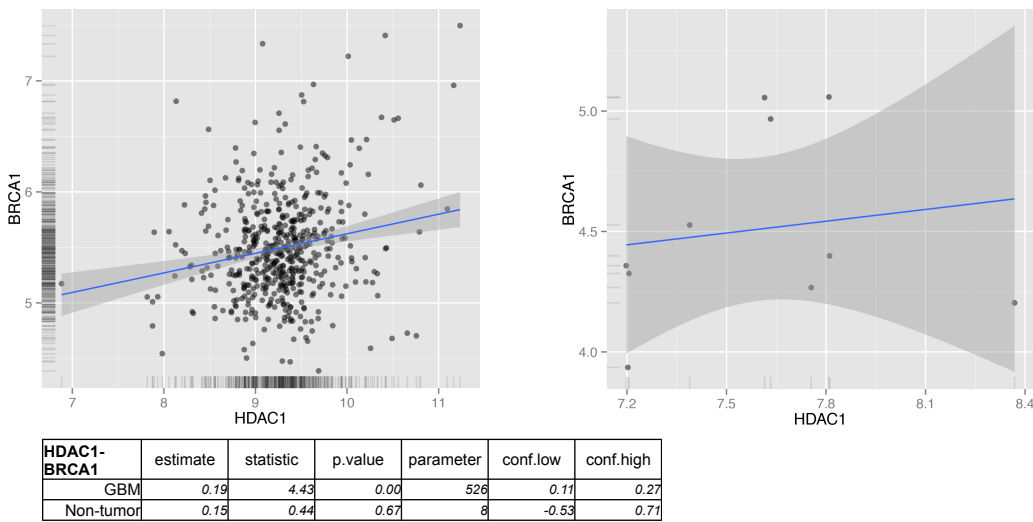

D

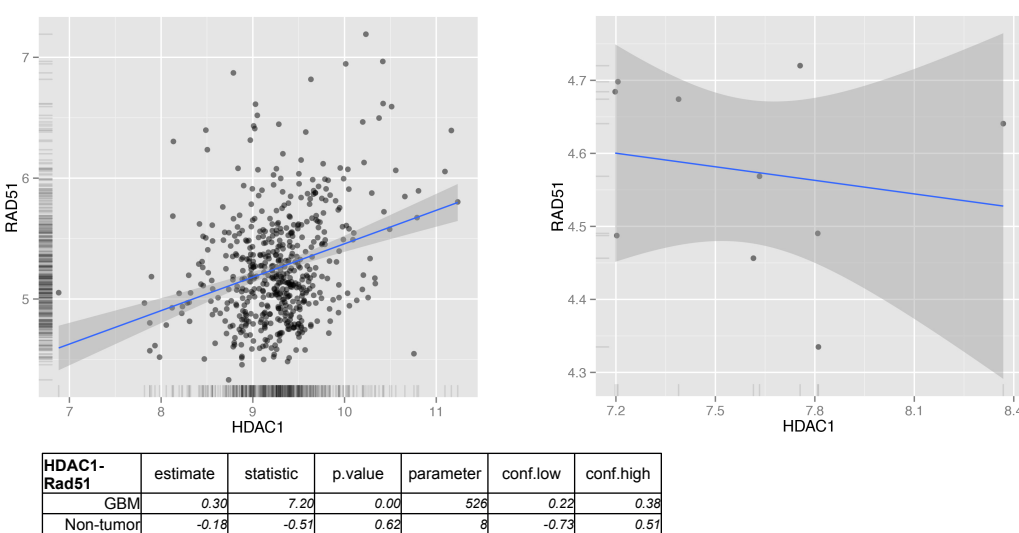

Supplement: MOL2-10-751-s003.pdf [file MOL2-10-751-s003.pdf]
